# Supplementary material for: What is the initiation step of the Grubbs-Hoveyda olefinmetathesiscatalyst?
Source: Royal Society of Chemistry journal article supplement (doi:10.1039/c1cc11230a), 2011-01-01

## Supporting Information

### What is the initiation step of the Grubbs-Hoveyda olefin metathesis catalyst?

*Ian W. Ashworth, Ian H. Hillier, David J. Nelson, Jonathan M. Percy and Mark A. Vincent*

#### Contents

Page S2: Strategy for location of transition structures.

Page S3: Transition structures for dissociative, associative and interchange mechanisms.

Page S11: Full Gaussian03 reference.

Page S12: Experimental details and results.

#### Strategy for the location of Transition Structures.

The location of energy minima is usually quite routine using the powerful algorithms in Gaussian, which allow starting structures far from the final minimum to be used. However, the location of transition structures requires somewhat better starting structures, particularly when the energy surfaces are flat. We found this to be particularly true in the case of the interchange mechanism, central to the present study. Here, the energy surface associated with the approach of ethene to the ruthenium was explored manually to locate a starting structure having low energy gradients, but which corresponded to a local energy maximum. This structure was then refined using the algorithms in Gaussian.

### Coordinates ( Å)

Dissociative mechanism (Fig. 1 (a))

|    |    |   |           |           |          |
|----|----|---|-----------|-----------|----------|
| 1  | 44 | 0 | -2.548413 | -1.863109 | 3.992229 |
| 2  | 6  | 0 | -4.156337 | -0.806411 | 3.924505 |
| 3  | 7  | 0 | -4.575881 | 0.149853  | 3.041291 |
| 4  | 6  | 0 | -5.704420 | 0.921644  | 3.572295 |
| 5  | 6  | 0 | -6.219534 | 0.029161  | 4.685050 |
| 6  | 7  | 0 | -5.058059 | -0.818915 | 4.950467 |
| 7  | 1  | 0 | -6.511500 | 0.578714  | 5.584052 |
| 8  | 1  | 0 | -7.075257 | -0.584046 | 4.367498 |
| 9  | 1  | 0 | -6.442397 | 1.117880  | 2.789616 |
| 10 | 1  | 0 | -5.345848 | 1.891685  | 3.944988 |
| 11 | 17 | 0 | -3.159028 | -4.093634 | 3.817291 |
| 12 | 17 | 0 | -1.608428 | -0.416763 | 5.550751 |
| 13 | 6  | 0 | -5.123796 | -1.850275 | 5.941169 |
| 14 | 6  | 0 | -5.705009 | -3.085238 | 5.601840 |
| 15 | 6  | 0 | -5.729790 | -4.084403 | 6.566651 |
| 16 | 6  | 0 | -5.213510 | -3.885323 | 7.847652 |
| 17 | 6  | 0 | -4.704310 | -2.631414 | 8.166889 |
| 18 | 6  | 0 | -4.661064 | -1.589817 | 7.237508 |
| 19 | 6  | 0 | -4.187247 | -0.235211 | 7.664731 |
| 20 | 1  | 0 | -4.020402 | 0.431557  | 6.819580 |
| 21 | 1  | 0 | -4.921796 | 0.227136  | 8.334480 |
| 22 | 1  | 0 | -3.245701 | -0.302570 | 8.214120 |
| 23 | 1  | 0 | -4.327419 | -2.449419 | 9.170999 |
| 24 | 6  | 0 | -5.203537 | -5.002779 | 8.844993 |
| 25 | 1  | 0 | -4.434343 | -5.741293 | 8.596517 |
| 26 | 1  | 0 | -6.157992 | -5.535884 | 8.863550 |
| 27 | 1  | 0 | -4.996743 | -4.642801 | 9.854649 |
| 28 | 1  | 0 | -6.148487 | -5.053566 | 6.304552 |

|    |   |   |           |           |           |
|----|---|---|-----------|-----------|-----------|
| 29 | 6 | 0 | -6.322035 | -3.321803 | 4.257085  |
| 30 | 1 | 0 | -5.784720 | -2.811406 | 3.456321  |
| 31 | 1 | 0 | -6.327926 | -4.385171 | 4.014455  |
| 32 | 1 | 0 | -7.362792 | -2.974903 | 4.238169  |
| 33 | 6 | 0 | -3.981555 | 0.595340  | 1.822155  |
| 34 | 6 | 0 | -4.562750 | 0.144065  | 0.624449  |
| 35 | 6 | 0 | -4.023083 | 0.577564  | -0.580284 |
| 36 | 6 | 0 | -2.926978 | 1.443722  | -0.622743 |
| 37 | 6 | 0 | -2.382156 | 1.874356  | 0.581674  |
| 38 | 6 | 0 | -2.888363 | 1.466686  | 1.819600  |
| 39 | 6 | 0 | -2.207868 | 1.895603  | 3.078699  |
| 40 | 1 | 0 | -1.387742 | 1.206755  | 3.311814  |
| 41 | 1 | 0 | -1.787388 | 2.899383  | 2.977193  |
| 42 | 1 | 0 | -2.864287 | 1.877222  | 3.950774  |
| 43 | 6 | 0 | -5.680686 | -0.852817 | 0.655153  |
| 44 | 1 | 0 | -5.351636 | -1.796852 | 1.104863  |
| 45 | 1 | 0 | -6.534842 | -0.511482 | 1.249079  |
| 46 | 1 | 0 | -6.041822 | -1.071051 | -0.351129 |
| 47 | 1 | 0 | -4.458133 | 0.220171  | -1.511196 |
| 48 | 1 | 0 | -1.524460 | 2.543796  | 0.567019  |
| 49 | 6 | 0 | -2.360401 | 1.888318  | -1.936063 |
| 50 | 1 | 0 | -2.068784 | 1.033217  | -2.552770 |
| 51 | 1 | 0 | -1.479327 | 2.518303  | -1.802774 |
| 52 | 1 | 0 | -3.093232 | 2.458949  | -2.515112 |
| 53 | 6 | 0 | -2.015026 | -1.587807 | 2.264496  |
| 54 | 1 | 0 | -2.817498 | -1.451594 | 1.531904  |
| 55 | 6 | 0 | -0.745620 | -1.882549 | 1.616093  |
| 56 | 6 | 0 | -0.806365 | -2.654642 | 0.442671  |
| 57 | 6 | 0 | 0.331068  | -3.028452 | -0.251772 |
| 58 | 6 | 0 | 1.570916  | -2.595132 | 0.205904  |
| 59 | 6 | 0 | 1.667277  | -1.792036 | 1.334806  |
| 60 | 6 | 0 | 0.522925  | -1.429358 | 2.051954  |

|    |   |   |           |           |           |
|----|---|---|-----------|-----------|-----------|
| 61 | 1 | 0 | 2.642232  | -1.445879 | 1.653915  |
| 62 | 1 | 0 | 2.476327  | -2.868600 | -0.326789 |
| 63 | 1 | 0 | 0.253450  | -3.643043 | -1.141632 |
| 64 | 1 | 0 | -1.786506 | -2.975926 | 0.099383  |
| 65 | 8 | 0 | 0.533251  | -0.631948 | 3.143198  |
| 66 | 6 | 0 | 1.707983  | 0.160859  | 3.426776  |
| 67 | 1 | 0 | 2.584934  | -0.501277 | 3.415412  |
| 68 | 6 | 0 | 1.521722  | 0.708761  | 4.820597  |
| 69 | 1 | 0 | 0.650413  | 1.366698  | 4.864588  |
| 70 | 1 | 0 | 1.362043  | -0.092823 | 5.541996  |
| 71 | 1 | 0 | 2.405541  | 1.280942  | 5.113593  |
| 72 | 6 | 0 | 1.855864  | 1.254096  | 2.385772  |
| 73 | 1 | 0 | 0.989517  | 1.921259  | 2.421123  |
| 74 | 1 | 0 | 1.933354  | 0.850508  | 1.374015  |
| 75 | 1 | 0 | 2.750590  | 1.850047  | 2.582137  |

Associative mechanism (Fig. 1 (b))

|    |    |   |           |           |           |
|----|----|---|-----------|-----------|-----------|
| 1  | 6  | 0 | 1.109253  | -3.293749 | -0.870124 |
| 2  | 6  | 0 | 2.016419  | -2.235708 | -0.634626 |
| 3  | 6  | 0 | 3.392937  | -2.494431 | -0.741606 |
| 4  | 6  | 0 | 3.861200  | -3.750240 | -1.090909 |
| 5  | 6  | 0 | 2.949454  | -4.782405 | -1.292922 |
| 6  | 6  | 0 | 1.578046  | -4.570111 | -1.169701 |
| 7  | 6  | 0 | 1.518322  | -0.947736 | -0.227050 |
| 8  | 44 | 0 | -0.293741 | -0.595919 | -0.110809 |
| 9  | 17 | 0 | -2.347078 | -1.183036 | 1.172931  |
| 10 | 8  | 0 | -0.195636 | -2.938642 | -0.719611 |
| 11 | 6  | 0 | -1.244945 | -3.943086 | -0.956982 |
| 12 | 6  | 0 | -1.537461 | -4.640410 | 0.352529  |
| 13 | 6  | 0 | -0.264589 | 1.396315  | -0.002614 |
| 14 | 7  | 0 | -1.368012 | 2.174037  | -0.215293 |
| 15 | 6  | 0 | -1.061445 | 3.602010  | -0.353866 |

|    |    |   |           |           |           |
|----|----|---|-----------|-----------|-----------|
| 16 | 6  | 0 | 0.393733  | 3.677766  | 0.055077  |
| 17 | 7  | 0 | 0.787512  | 2.266359  | 0.101810  |
| 18 | 6  | 0 | -2.756137 | 1.832064  | -0.120769 |
| 19 | 6  | 0 | -3.329579 | 1.798881  | 1.161516  |
| 20 | 6  | 0 | -4.683755 | 1.525828  | 1.274608  |
| 21 | 6  | 0 | -5.480359 | 1.297734  | 0.150646  |
| 22 | 6  | 0 | -4.895014 | 1.409738  | -1.103859 |
| 23 | 6  | 0 | -3.537797 | 1.703043  | -1.270640 |
| 24 | 6  | 0 | -2.486407 | 2.030469  | 2.374919  |
| 25 | 6  | 0 | -3.006424 | 1.936896  | -2.651377 |
| 26 | 6  | 0 | -6.928220 | 0.946367  | 0.304343  |
| 27 | 6  | 0 | 2.180351  | 1.999196  | 0.214592  |
| 28 | 6  | 0 | 2.791218  | 2.072219  | 1.471148  |
| 29 | 6  | 0 | 4.155790  | 1.784827  | 1.557130  |
| 30 | 6  | 0 | 4.913350  | 1.474582  | 0.431419  |
| 31 | 6  | 0 | 4.282378  | 1.482475  | -0.815196 |
| 32 | 6  | 0 | 2.922939  | 1.743806  | -0.950502 |
| 33 | 6  | 0 | 2.026399  | 2.475974  | 2.696442  |
| 34 | 6  | 0 | 6.367835  | 1.133405  | 0.544065  |
| 35 | 6  | 0 | 2.254924  | 1.679745  | -2.285951 |
| 36 | 17 | 0 | -0.756097 | -0.393050 | -2.371014 |
| 37 | 6  | 0 | -2.436927 | -3.266519 | -1.586735 |
| 38 | 6  | 0 | 0.526979  | -1.964977 | 2.446383  |
| 39 | 6  | 0 | 0.609011  | -0.654207 | 2.689930  |
| 40 | 1  | 0 | 3.303649  | -5.778900 | -1.537205 |
| 41 | 1  | 0 | 0.902232  | -5.404911 | -1.300481 |
| 42 | 1  | 0 | 4.082160  | -1.676008 | -0.545213 |
| 43 | 1  | 0 | -2.171539 | -2.818032 | -2.543832 |
| 44 | 1  | 0 | -3.208770 | -4.022880 | -1.756549 |
| 45 | 1  | 0 | -2.849574 | -2.491595 | -0.938903 |
| 46 | 1  | 0 | -1.723709 | 4.191182  | 0.287241  |
| 47 | 1  | 0 | -1.234529 | 3.921419  | -1.389779 |

|    |   |   |           |           |           |
|----|---|---|-----------|-----------|-----------|
| 48 | 1 | 0 | 0.540542  | 4.146160  | 1.037606  |
| 49 | 1 | 0 | 1.019661  | 4.215827  | -0.663418 |
| 50 | 1 | 0 | -0.826607 | -4.645451 | -1.684472 |
| 51 | 1 | 0 | 4.637116  | 1.811186  | 2.532493  |
| 52 | 1 | 0 | 4.864375  | 1.262883  | -1.707988 |
| 53 | 1 | 0 | -5.126719 | 1.466032  | 2.266138  |
| 54 | 1 | 0 | -5.510507 | 1.280190  | -1.991882 |
| 55 | 1 | 0 | 1.543516  | 2.498516  | -2.433334 |
| 56 | 1 | 0 | 2.987492  | 1.712588  | -3.094266 |
| 57 | 1 | 0 | 1.669957  | 0.759089  | -2.390786 |
| 58 | 1 | 0 | 2.415868  | 1.983623  | 3.590592  |
| 59 | 1 | 0 | 2.112543  | 3.555054  | 2.869356  |
| 60 | 1 | 0 | 0.962162  | 2.243518  | 2.617447  |
| 61 | 1 | 0 | -1.720651 | 1.253970  | 2.460845  |
| 62 | 1 | 0 | -1.970052 | 2.997991  | 2.342244  |
| 63 | 1 | 0 | -3.089635 | 2.004583  | 3.283718  |
| 64 | 1 | 0 | -1.934762 | 2.129943  | -2.660263 |
| 65 | 1 | 0 | -3.174294 | 1.068277  | -3.292648 |
| 66 | 1 | 0 | -3.521347 | 2.787004  | -3.113056 |
| 67 | 1 | 0 | 6.971168  | 1.705495  | -0.166098 |
| 68 | 1 | 0 | 6.753349  | 1.327004  | 1.546516  |
| 69 | 1 | 0 | 6.544051  | 0.075113  | 0.323549  |
| 70 | 1 | 0 | -7.435029 | 1.617856  | 1.003364  |
| 71 | 1 | 0 | -7.458750 | 0.988827  | -0.648969 |
| 72 | 1 | 0 | -7.045158 | -0.067629 | 0.700497  |
| 73 | 1 | 0 | 4.925814  | -3.934701 | -1.184696 |
| 74 | 1 | 0 | -2.232698 | -5.468394 | 0.190180  |
| 75 | 1 | 0 | -1.992858 | -3.938462 | 1.054915  |
| 76 | 1 | 0 | -0.624934 | -5.046972 | 0.798623  |
| 77 | 1 | 0 | 2.291890  | -0.326551 | 0.232764  |
| 78 | 1 | 0 | -0.251274 | -0.095481 | 3.044553  |
| 79 | 1 | 0 | -0.406601 | -2.503104 | 2.567802  |

|    |   |   |          |           |          |
|----|---|---|----------|-----------|----------|
| 80 | 1 | 0 | 1.391707 | -2.537700 | 2.120963 |
| 81 | 1 | 0 | 1.545749 | -0.116769 | 2.579276 |

Interchange mechanism (Fig. 1 (c))

|    |    |   |           |           |           |
|----|----|---|-----------|-----------|-----------|
| 1  | 6  | 0 | -5.337961 | -1.760197 | 7.902774  |
| 2  | 6  | 0 | -5.372555 | -0.367419 | 7.717288  |
| 3  | 6  | 0 | -4.724651 | 0.506522  | 8.602433  |
| 4  | 6  | 0 | -3.965619 | -0.048404 | 9.630495  |
| 5  | 6  | 0 | -3.827103 | -1.423881 | 9.785092  |
| 6  | 6  | 0 | -4.533221 | -2.262216 | 8.922400  |
| 7  | 7  | 0 | -6.212252 | 0.179892  | 6.697935  |
| 8  | 6  | 0 | -5.936842 | 0.252005  | 5.361338  |
| 9  | 7  | 0 | -7.115985 | 0.595625  | 4.748682  |
| 10 | 6  | 0 | -8.161029 | 0.940573  | 5.719186  |
| 11 | 6  | 0 | -7.636335 | 0.326861  | 6.996570  |
| 12 | 44 | 0 | -4.149859 | 0.083309  | 4.632845  |
| 13 | 17 | 0 | -3.866688 | -2.260854 | 4.859271  |
| 14 | 6  | 0 | -7.450731 | 0.801668  | 3.375277  |
| 15 | 6  | 0 | -8.162452 | -0.227459 | 2.735966  |
| 16 | 6  | 0 | -8.595438 | -0.026110 | 1.429716  |
| 17 | 6  | 0 | -8.333531 | 1.163601  | 0.747887  |
| 18 | 6  | 0 | -7.623695 | 2.160237  | 1.411558  |
| 19 | 6  | 0 | -7.177290 | 2.011314  | 2.725792  |
| 20 | 6  | 0 | -8.368838 | -1.541579 | 3.424768  |
| 21 | 6  | 0 | -8.797503 | 1.365517  | -0.662073 |
| 22 | 6  | 0 | -6.385943 | 3.098850  | 3.376143  |
| 23 | 6  | 0 | -4.812522 | 1.993725  | 8.469190  |
| 24 | 6  | 0 | -2.909678 | -1.982360 | 10.828364 |
| 25 | 6  | 0 | -6.186822 | -2.691984 | 7.092732  |
| 26 | 6  | 0 | -4.764259 | -0.142291 | 2.914048  |
| 27 | 6  | 0 | -4.236878 | 0.200756  | 1.617784  |
| 28 | 6  | 0 | -5.015843 | -0.143565 | 0.494750  |



|    |    |   |           |           |           |
|----|----|---|-----------|-----------|-----------|
| 29 | 6  | 0 | -4.665741 | 0.233913  | -0.788178 |
| 30 | 6  | 0 | -3.505726 | 0.979634  | -0.974260 |
| 31 | 6  | 0 | -2.698516 | 1.325467  | 0.103326  |
| 32 | 6  | 0 | -3.036171 | 0.921982  | 1.398184  |
| 33 | 8  | 0 | -2.278153 | 1.152069  | 2.489207  |
| 34 | 6  | 0 | -1.212418 | 2.136677  | 2.393729  |
| 35 | 6  | 0 | -0.339491 | 1.930953  | 3.603365  |
| 36 | 17 | 0 | -3.625789 | 2.311493  | 5.250182  |
| 37 | 6  | 0 | -1.804939 | 3.528772  | 2.319519  |
| 38 | 6  | 0 | -1.828977 | -0.326039 | 7.004989  |
| 39 | 6  | 0 | -1.069459 | -0.565145 | 5.929663  |
| 40 | 1  | 0 | -3.215534 | 1.298140  | -1.970811 |
| 41 | 1  | 0 | -1.800940 | 1.901813  | -0.077565 |
| 41 | 1  | 0 | -1.800940 | 1.901813  | -0.077565 |
| 42 | 1  | 0 | -5.930489 | -0.703159 | 0.671692  |
| 43 | 1  | 0 | 0.088281  | 0.927056  | 3.610259  |
| 44 | 1  | 0 | 0.477917  | 2.656385  | 3.598521  |
| 45 | 1  | 0 | -0.929878 | 2.067631  | 4.511832  |
| 46 | 1  | 0 | -7.781427 | 0.956974  | 7.878364  |
| 47 | 1  | 0 | -8.080011 | -0.657106 | 7.205333  |
| 48 | 1  | 0 | -8.254754 | 2.033946  | 5.785198  |
| 49 | 1  | 0 | -9.128889 | 0.542095  | 5.403458  |
| 50 | 1  | 0 | -0.629891 | 1.911804  | 1.490612  |
| 51 | 1  | 0 | -7.399455 | 3.088819  | 0.890101  |
| 52 | 1  | 0 | -9.134003 | -0.824531 | 0.924115  |
| 53 | 1  | 0 | -3.432033 | 0.621003  | 10.301647 |
| 54 | 1  | 0 | -4.463697 | -3.340153 | 9.049911  |
| 55 | 1  | 0 | -8.905073 | -1.441187 | 4.374499  |
| 56 | 1  | 0 | -8.933418 | -2.232570 | 2.796742  |
| 57 | 1  | 0 | -7.408333 | -2.013284 | 3.666671  |
| 58 | 1  | 0 | -6.759975 | 4.084201  | 3.087293  |
| 59 | 1  | 0 | -6.381483 | 3.026738  | 4.464890  |

|    |   |   |           |           |           |
|----|---|---|-----------|-----------|-----------|
| 60 | 1 | 0 | -5.333628 | 3.044173  | 3.074873  |
| 61 | 1 | 0 | -5.594693 | 2.307594  | 7.776350  |
| 62 | 1 | 0 | -4.989606 | 2.459670  | 9.442739  |
| 63 | 1 | 0 | -3.875254 | 2.392694  | 8.072882  |
| 64 | 1 | 0 | -6.411144 | -2.300828 | 6.100000  |
| 65 | 1 | 0 | -5.689791 | -3.652956 | 6.953193  |
| 66 | 1 | 0 | -7.135735 | -2.887877 | 7.608631  |
| 67 | 1 | 0 | -9.641111 | 2.062237  | -0.709168 |
| 68 | 1 | 0 | -8.005300 | 1.788061  | -1.286378 |
| 69 | 1 | 0 | -9.124069 | 0.428787  | -1.118374 |
| 70 | 1 | 0 | -2.981167 | -1.430584 | 11.769189 |
| 71 | 1 | 0 | -3.116389 | -3.034514 | 11.033353 |
| 72 | 1 | 0 | -1.866860 | -1.912392 | 10.498458 |
| 73 | 1 | 0 | -5.288604 | -0.040670 | -1.632504 |
| 74 | 1 | 0 | -1.009192 | 4.271228  | 2.218463  |
| 75 | 1 | 0 | -2.368181 | 3.739113  | 3.232104  |
| 76 | 1 | 0 | -2.477064 | 3.638089  | 1.465075  |
| 77 | 1 | 0 | -5.678735 | -0.735092 | 2.804904  |
| 78 | 1 | 0 | -2.672209 | -0.964392 | 7.265414  |
| 79 | 8 | 0 | -1.687577 | 0.666560  | 7.906742  |
| 80 | 1 | 0 | -0.208280 | 0.036288  | 5.674495  |
| 81 | 1 | 0 | -1.300333 | -1.420793 | 5.309923  |
| 82 | 6 | 0 | -0.665118 | 1.625070  | 7.650364  |
| 83 | 6 | 0 | -0.721292 | 2.651655  | 8.749032  |
| 84 | 1 | 0 | 0.310760  | 1.119101  | 7.617058  |
| 85 | 1 | 0 | -0.843360 | 2.075943  | 6.665198  |
| 86 | 1 | 0 | 0.060884  | 3.401558  | 8.614715  |
| 87 | 1 | 0 | -1.685815 | 3.164568  | 8.751940  |
| 88 | 1 | 0 | -0.581240 | 2.183933  | 9.726391  |

**Full Gaussian 03 reference**

M. J. Frisch, G. W. Trucks, H. B. Schlegel, G. E. Scuseria, M. A. Robb, J. R. Cheeseman, J. A. Montgomery, T. Vreven, K. N. Kudin, J. C. Burant, J. M. Millam, S. S. Iyengar, J. Tomasi, V. Barone, B. Mennucci, M. Cossi, G. Scalmani, N. Rega, G. A. Petersson, H. Nakatsuji, M. Hada, M. Ehara, K. Toyota, R. Fukuda, J. Hasegawa, M. Ishida, T. Nakajima, Y. Honda, O. Kitao, H. Nakai, M. Klene, X. Li, J. E. Knox, H. P. Hratchian, J. B. Cross, C. Adamo, J. Jaramillo, R. Gomperts, R. E. Stratmann, O. Yazyev, A. J. Austin, R. Cammi, C. Pomelli, J. W. Ochterski, P. Y. Ayala, K. Morokuma, G. A. Voth, P. Salvador, J. J. Dannenberg, V. G. Zakrzewski, S. Dapprich, A. D. Daniels, M. C. Strain, O. Farkas, D. K. Malick, A. D. Rabuck, K. Raghavachari, J. B. Foresman, J. V. Ortiz, Q. Cui, A. G. Baboul, S. Clifford, J. Cioslowski, B. B. Stefanov, G. Liu, A. Liashenko, P. Piskorz, I. Komaromi, R. L. Martin, D. J. Fox, T. Keith, M. A. Al-Laham, C. Y. Peng, A. Nanayakkara, M. Challacombe, P. M. W. Gill, B. Johnson, W. Chen, M. W. Wong, C. Gonzalez and J. A. Pople, *Gaussian 03, Revision D.02*, Gaussian Inc., Wallingford, CT, 2004.

## Experimental

Dichloromethane was dried immediately before use using an Innovative Technologies PureSolv apparatus. Ethyl vinyl ether was purchased from Alfa Aesar and purified by distillation at atmospheric pressure on the day of use to remove stabilisers. Grubbs-Hoveyda 2<sup>nd</sup> generation pre-catalyst was purchased from Sigma-Aldrich and used as supplied. Stock solutions were prepared using dry volumetric glassware. Solvents and solutions were handled using dry glass syringes. The pre-catalyst and solutions thereof were handled with care under nitrogen at all times.

UV/Vis reaction mixtures were prepared as follows. A solution of ethyl vinyl ether in dichloromethane (typically 285 mg in 1 mL, *ca.* 4 mol L<sup>-1</sup>) was accurately prepared. A concentrated stock solution of Grubbs-Hoveyda II was prepared (16.1 – 16.3 mM; 10.1 to 10.2 mg in 2 mL solvent) and diluted to approx. 0.3 mM in a 5 mL (185  $\mu$ L conc. stock) or 10 mL (370  $\mu$ L conc. stock) volumetric flask. An appropriate quantity of solvent (2.00, 2.00, 1.90 or 1.8 mL for 25, 50, 100 or 200 mM ethyl vinyl ether concentration, respectively) was accurately added to dry stoppered quartz cuvettes, followed by 1 mL of the dilute Grubbs-Hoveyda II stock.

UV/Vis spectra were recorded on a Cary 50 spectrometer equipped with a water-cooled peltier for temperature control. A baseline was recorded (using solvent dispensed at the same time as that used to prepare the samples in a clean cuvette) and then the reaction sample was equilibrated at the appropriate temperature in the spectrometer. An appropriate volume of ethyl vinyl ether solution (19  $\mu$ L = 25 mM, 38  $\mu$ L = 50 mM, 75  $\mu$ L = 100 mM, 150  $\mu$ L = 200 mM) was added, the cuvette was shaken, and UV spectra were recorded over time for 3 or more half-lives.

A sample UV/Vis spectrum can be found in **Figure S1**. The corresponding raw absorbance (abs.) *versus* time (t) dataset and processed dataset (**Figure S2**) are also provided in this document.

Absorbance/time data for  $\lambda = 377$  nm was processed using the Guggenheim method (**Equation S1**) to obtain pseudo-first-order rate constants for each experiment (**Table S1**). Second order rate constants were calculated from the concentration and first-order rate constant (**Table S2**). These second order rate constants were used to construct a plot of

$\ln(k/T)$  versus  $1/T$  (**Figure S3**), which was in turn used to derive the thermodynamic parameters for activation.

**Figure S1.** Sample UV/Vis spectra from the initiation of Grubbs-Hoveyda II (0.1 mM) with ethyl vinyl ether (200 mM) at 25°C in dichloromethane, showing well-behaved isosbestic points.

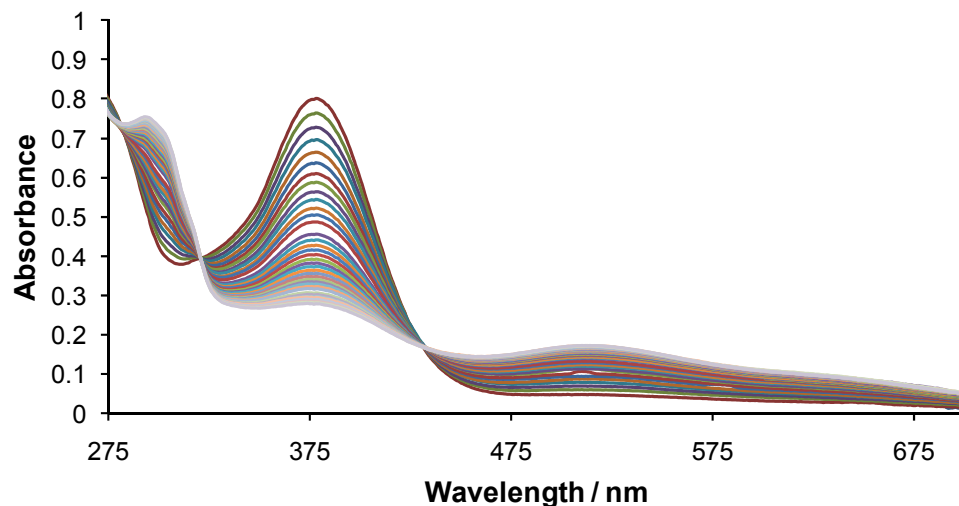

**Figure S2.** (a) Raw absorbance/time data and (b) data processed using the Guggenheim method ( $k_{\text{obs}} = 5.072 \times 10^{-3} \text{ s}^{-1}$ ) for the reaction of Grubbs-Hoveyda II (0.1 mM) with ethyl vinyl ether (200 mM) at 25°C in dichloromethane.

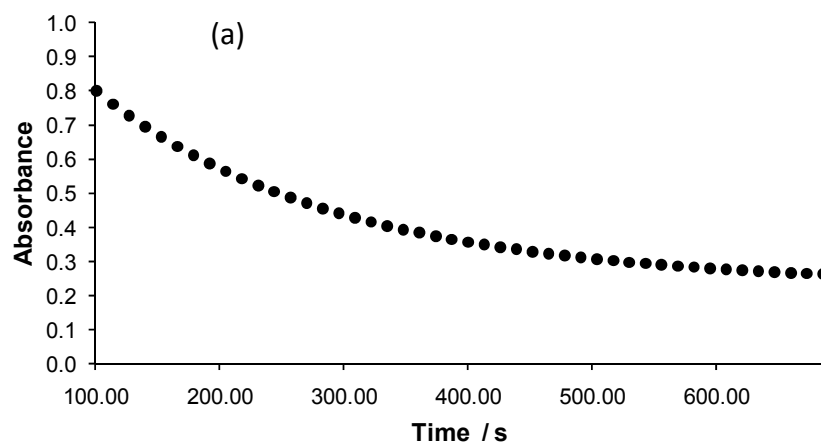

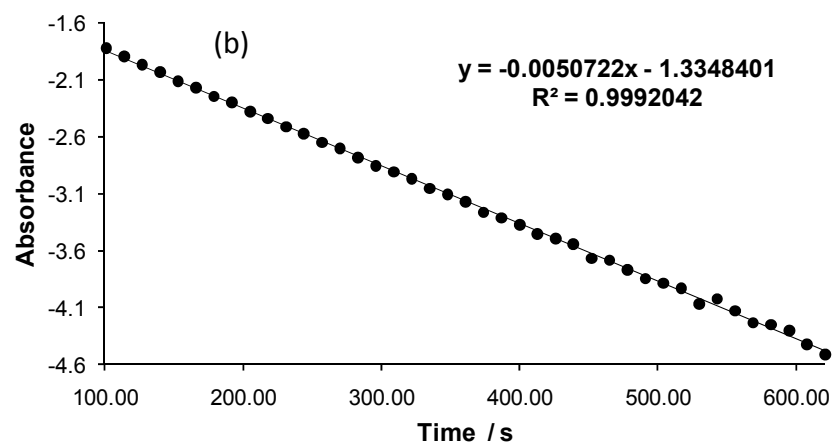

### Equation S1

$$\ln(\text{Abs}(t) - \text{Abs}(t+\Delta t)) = -k_{\text{obs}}t$$

**Table S1.** First-order rate constants.  $R^2 > 0.997$  for all fits.

| T (K)  | [EVE] (mM) | $k_{\text{obs}}$ ( $\text{s}^{-1}$ ) | T (K)  | [EVE] (mM) | $k_{\text{obs}}$ ( $\text{s}^{-1}$ ) |
|--------|------------|--------------------------------------|--------|------------|--------------------------------------|
| 283.15 | 25.2       | $1.780 \times 10^{-4}$               | 283.15 | 24.8       | $1.815 \times 10^{-4}$               |
| 283.15 | 50.1       | $3.568 \times 10^{-4}$               | 283.15 | 49.3       | $3.640 \times 10^{-4}$               |
| 283.15 | 101.0      | $7.131 \times 10^{-4}$               | 283.15 | 99.3       | $7.039 \times 10^{-4}$               |
| 283.15 | 200.2      | $1.381 \times 10^{-3}$               | 283.15 | 197.0      | $1.380 \times 10^{-3}$               |
| 293.15 | 25.3       | $4.240 \times 10^{-4}$               | 293.15 | 25.0       | $4.192 \times 10^{-4}$               |
| 293.15 | 50.3       | $8.464 \times 10^{-4}$               | 293.15 | 49.6       | $8.304 \times 10^{-4}$               |
| 293.15 | 101.3      | $1.651 \times 10^{-3}$               | 293.15 | 100.1      | $1.677 \times 10^{-3}$               |
| 293.15 | 200.9      | $3.254 \times 10^{-3}$               | 293.15 | 198.4      | $3.205 \times 10^{-3}$               |
| 298.15 | 25.0       | $6.461 \times 10^{-4}$               | 298.15 | 24.8       | $6.559 \times 10^{-4}$               |
| 298.15 | 49.7       | $1.292 \times 10^{-3}$               |        |            |                                      |
| 298.15 | 100.1      | $2.637 \times 10^{-3}$               | 298.15 | 99.5       | $2.624 \times 10^{-3}$               |
| 298.15 | 198.6      | $5.176 \times 10^{-3}$               | 298.15 | 197.3      | $5.221 \times 10^{-3}$               |
| 298.15 | 24.9       | $6.365 \times 10^{-4}$               |        |            |                                      |
| 298.15 | 49.6       | $1.308 \times 10^{-3}$               | 298.15 | 50.0       | $1.292 \times 10^{-3}$               |
| 298.15 | 99.9       | $2.614 \times 10^{-3}$               | 298.15 | 100.8      | $2.625 \times 10^{-3}$               |
| 298.15 | 198.1      | $5.132 \times 10^{-3}$               | 298.15 | 199.8      | $5.090 \times 10^{-3}$               |
| 303.15 | 25.2       | $9.940 \times 10^{-4}$               | 303.15 | 24.9       | $9.818 \times 10^{-4}$               |
| 303.15 | 50.2       | $1.925 \times 10^{-3}$               | 303.15 | 49.5       | $1.960 \times 10^{-3}$               |
| 303.15 | 101.1      | $4.005 \times 10^{-3}$               | 303.15 | 99.8       | $3.821 \times 10^{-3}$               |
| 303.15 | 200.6      | $7.723 \times 10^{-3}$               | 303.15 | 198.0      | $7.461 \times 10^{-3}$               |

**Table S2.** Second-order rate constants.  $R^2 > 0.999$  in all cases.

| Temperature  | $k_{\text{init}}$                       |
|--------------|-----------------------------------------|
| 283.15 K (1) | $0.00694 \text{ M}^{-1} \text{ s}^{-1}$ |
| 283.15 K (2) | $0.00704 \text{ M}^{-1} \text{ s}^{-1}$ |
| 293.15 K (1) | $0.01625 \text{ M}^{-1} \text{ s}^{-1}$ |
| 293.15 K (2) | $0.01630 \text{ M}^{-1} \text{ s}^{-1}$ |
| 298.15 K (1) | $0.02628 \text{ M}^{-1} \text{ s}^{-1}$ |
| 298.15 K (2) | $0.02634 \text{ M}^{-1} \text{ s}^{-1}$ |
| 298.15 K (3) | $0.02645 \text{ M}^{-1} \text{ s}^{-1}$ |
| 298.15 K (4) | $0.02611 \text{ M}^{-1} \text{ s}^{-1}$ |
| 303.15 K (1) | $0.03790 \text{ M}^{-1} \text{ s}^{-1}$ |
| 303.15 K (2) | $0.03871 \text{ M}^{-1} \text{ s}^{-1}$ |

**Figure S3.** Eyring plot for the initiation of Grubbs-Hoveyda II with ethyl vinyl ether in dichloromethane over the temperature range  $10^\circ\text{C} - 30^\circ\text{C}$ .

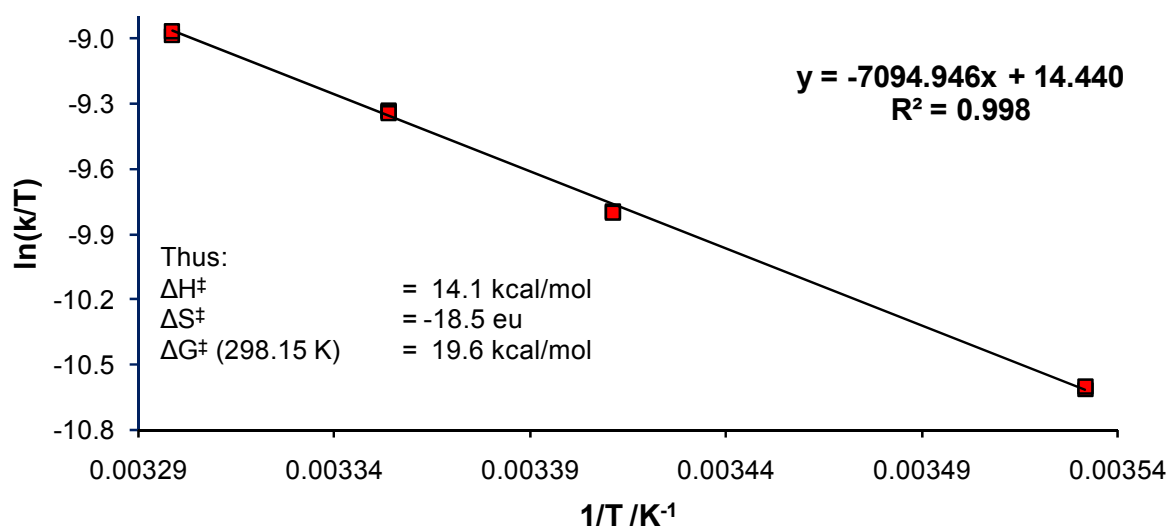

Supplement: c1cc11230a.pdf [file c1cc11230a.pdf]
